# Supplementary material
Source: MDPI journal article supplement (https://www.mdpi.com/2227-9717/7/4/178)
Supplement: s1 [file s1]

Article

# Effect of Morphology of Calcium Carbonate on Toughness Behavior and Thermal Stability of Epoxy-Based Composites

Guijun Yang, Young-Jung Heo and Soo-Jin Park \*

Department of Chemistry, Inha University, Incheon402-751, South Korea; yanggj91@gmail.com (G.Y.), heoyj1211@naver.com (Y.-J.H.)

\* Correspondence: Correspondence: sjpark@inha.ac.kr

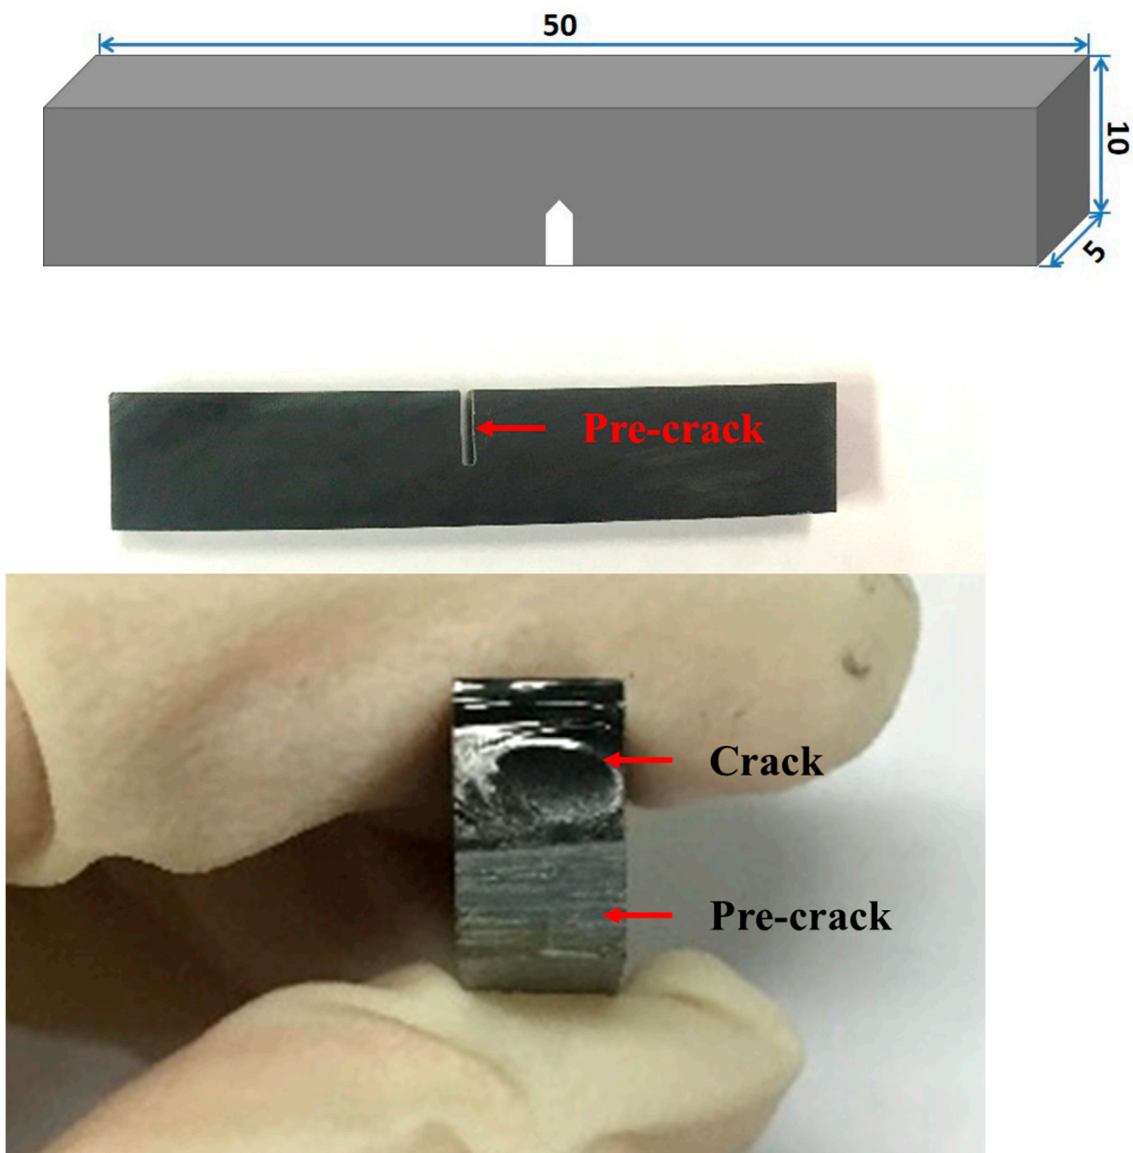

**Figure S1.** Dimensions of the sample for fracture toughness test (all dimensions are in mm) and the real photos of the prepared (before testing) and tested sample.

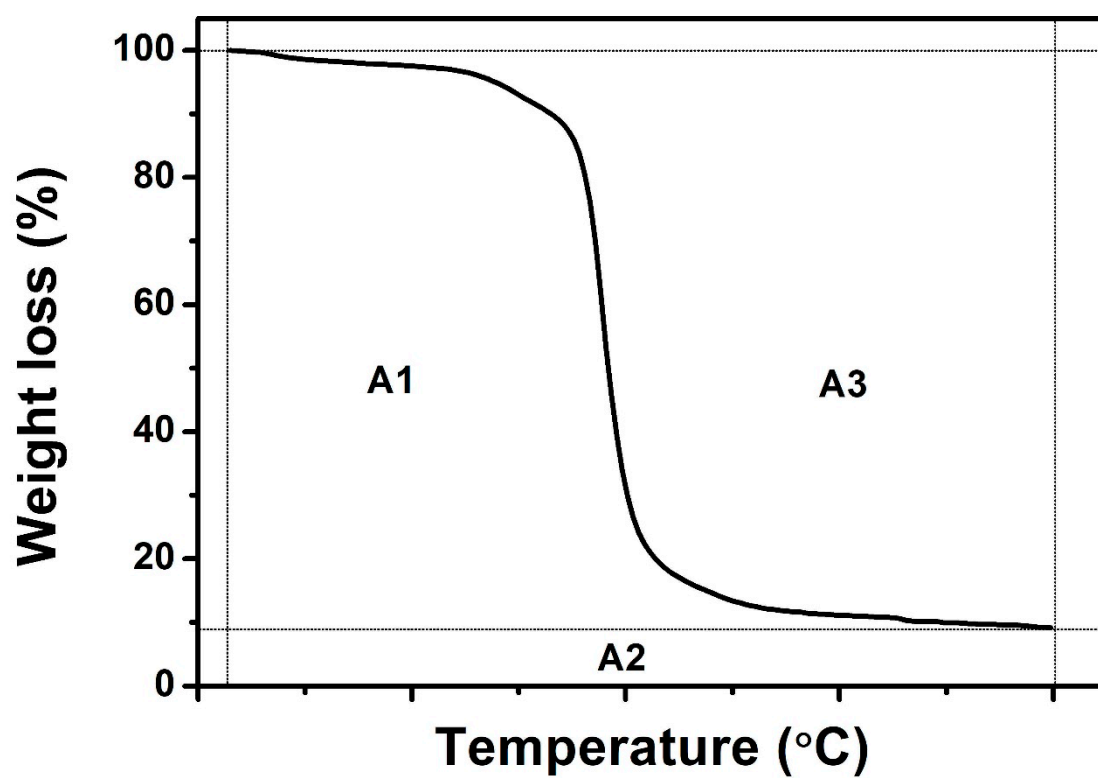

**Figure S2.** Schematic representations of A<sub>1</sub>, A<sub>2</sub> and A<sub>3</sub>.
